# Supplementary material for: In vitro hydrolysis of V-type starch inclusion complexes of alkyl gallates: the controlled two-step release behavior of gallic acid and its beneficial effect on glycemic control
Source: Royal Society of Chemistry journal article supplement (doi:10.1039/d4fo05743k), 2025-01-01
Supplement: d4fo05743k5.pdf [file d4fo05743k5.pdf]

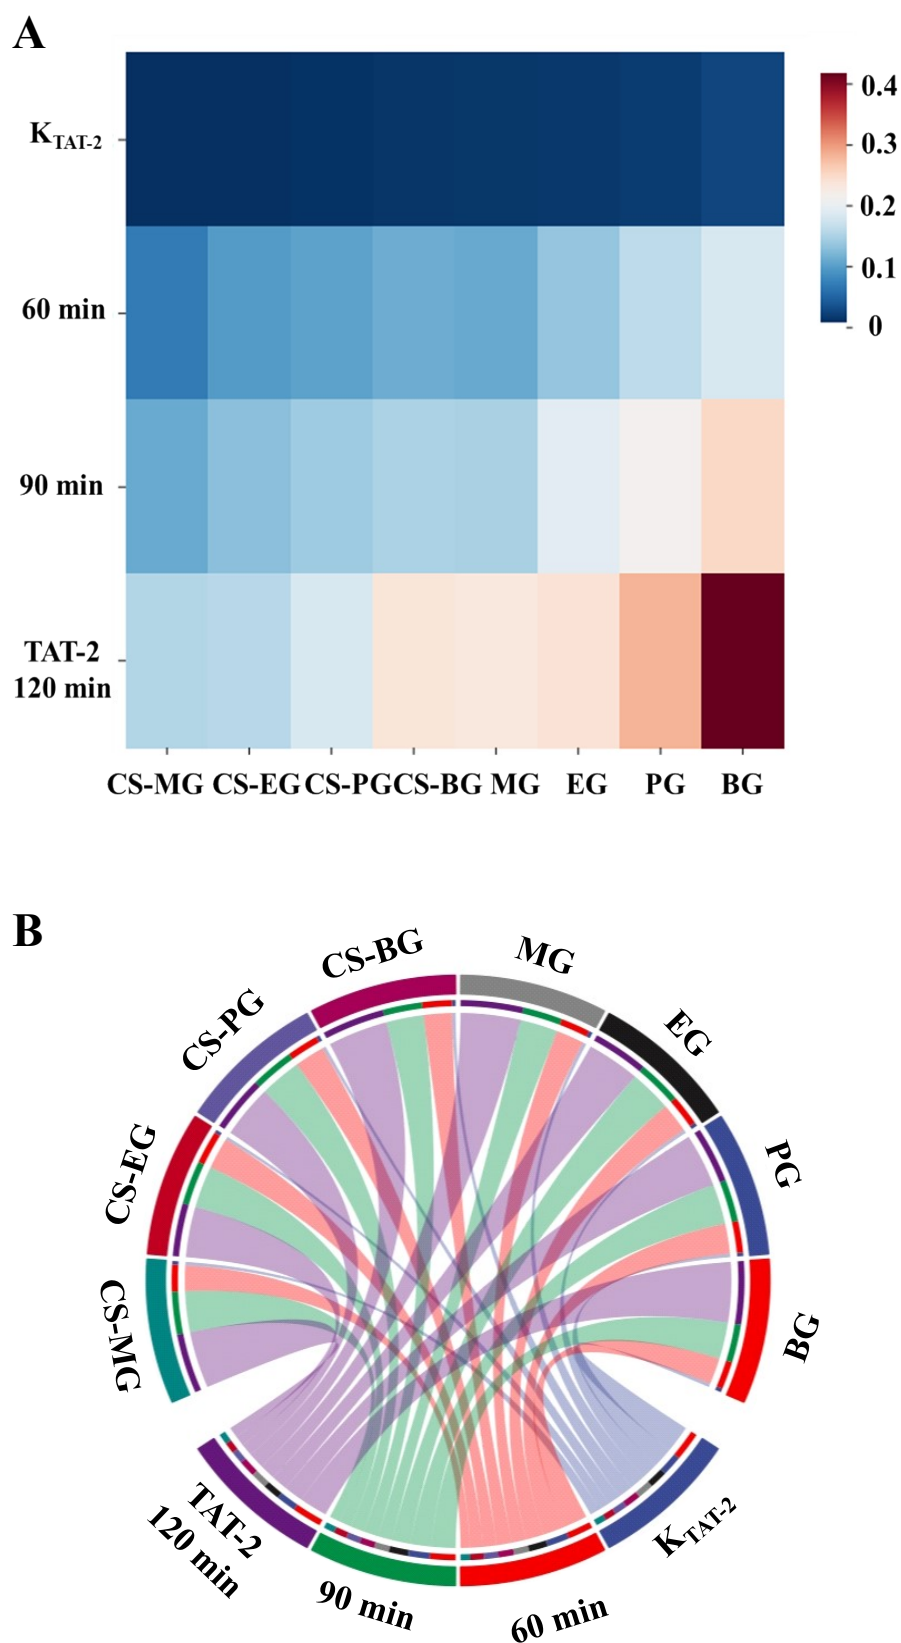

Figure 5S. Heat map (A) and chord diagram (B) for the transportation of gallic acid in everted rat gut sac model. MG, methyl gallate; EG, ethyl gallate; PG, propyl gallate;

BG, butyl gallate; CS-MG, corn starch inclusion complex of methyl gallate; CS-EG, corn starch inclusion complex of ethyl gallate; CS-PG, corn starch inclusion complex of propyl gallate; CS-BG, corn starch inclusion complex of butyl gallate.
