# Supplementary material for: In vitro hydrolysis of V-type starch inclusion complexes of alkyl gallates: the controlled two-step release behavior of gallic acid and its beneficial effect on glycemic control
Source: Royal Society of Chemistry journal article supplement (doi:10.1039/d4fo05743k), 2025-01-01
Supplement: d4fo05743k6.pdf [file d4fo05743k6.pdf]

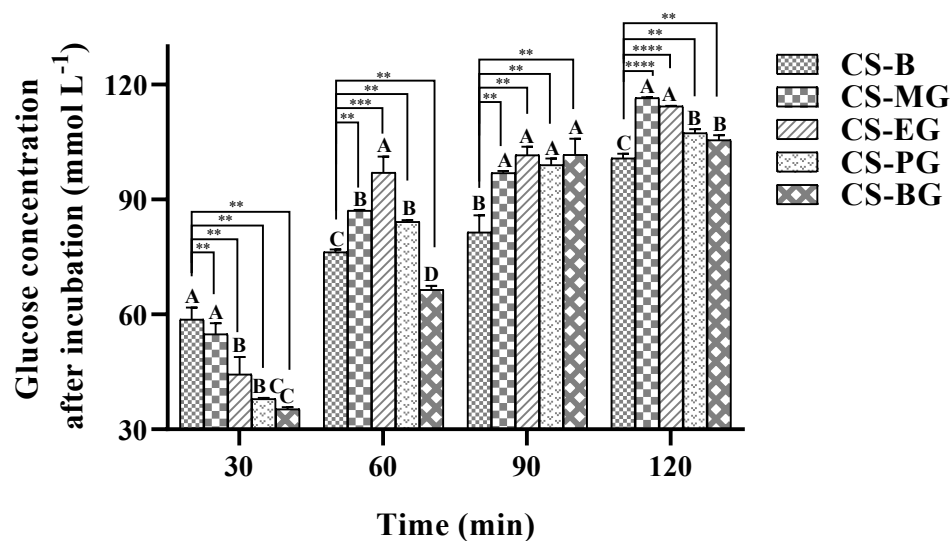

Figure 6S. Glucose concentration for the hydrolysis of starch in *in vitro* digestion model. All the tests were conducted with three replicates; Data were presented as mean  $\pm$  standard deviation (SD); Groups at the same time point with different upper-case letters (A-D) are significantly different at  $P < 0.05$  (SNK test); The asterisk of \*\* (or \*\*\*; or \*\*\*\*) indicates the significant differences between the two groups at  $P < 0.01$  (or  $P < 0.001$ ; or  $P < 0.0001$ ) (T test); CS-B, corn starch inclusion complex without any alkyl gallate; CS-MG, corn starch inclusion complex of methyl gallate; CS-EG, corn starch inclusion complex of ethyl gallate; CS-PG, corn starch inclusion complex of propyl gallate; CS-BG, corn starch inclusion complex of butyl gallate.
