# Supplementary material for: In vitro hydrolysis of V-type starch inclusion complexes of alkyl gallates: the controlled two-step release behavior of gallic acid and its beneficial effect on glycemic control
Source: Royal Society of Chemistry journal article supplement (doi:10.1039/d4fo05743k), 2025-01-01
Supplement: d4fo05743k7.pdf [file d4fo05743k7.pdf]

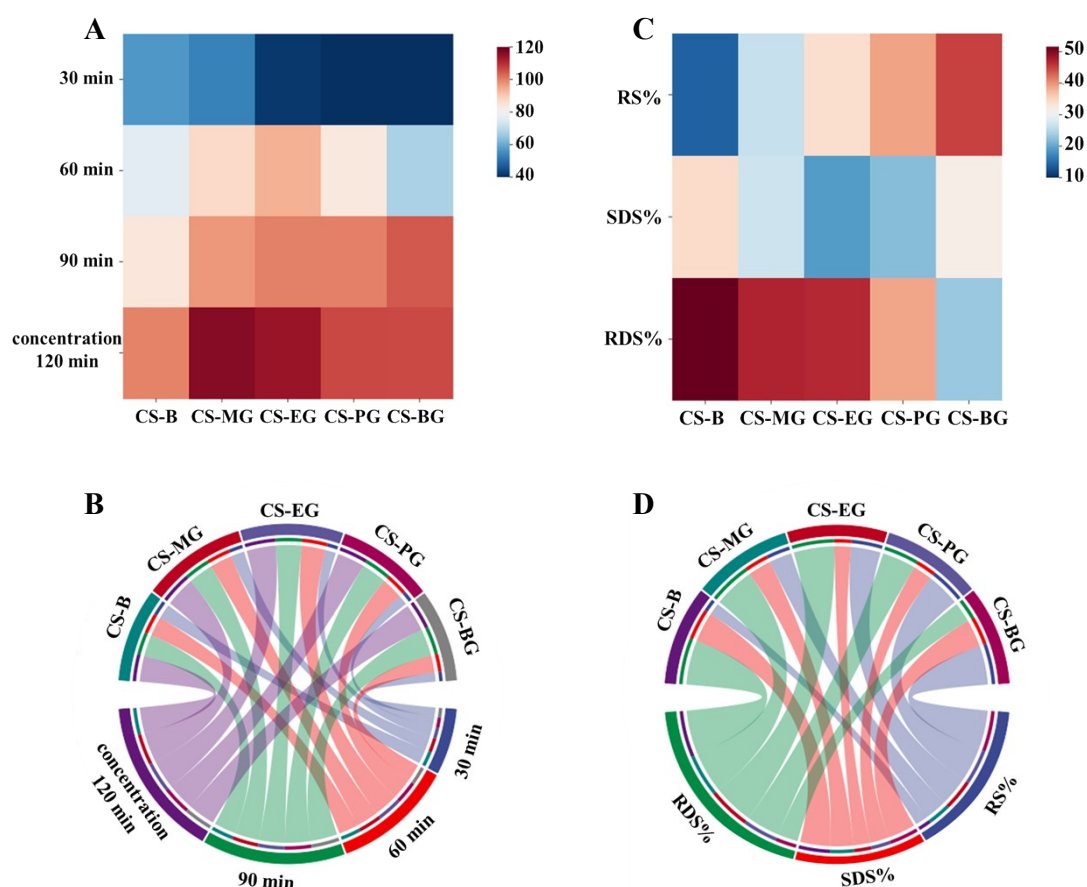

Figure 7S. Heat map of glucose concentration (A), chord diagram of glucose concentration (B), heat map of digestibility (C) and chord diagram of digestibility (D) for the hydrolysis of starch in *in vitro* digestion model. MG, methyl gallate; EG, ethyl gallate; PG, propyl gallate; BG, butyl gallate; CS-MG, corn starch inclusion complex of methyl gallate; CS-EG, corn starch inclusion complex of ethyl gallate; CS-PG, corn starch inclusion complex of propyl gallate; CS-BG, corn starch inclusion complex of butyl gallate.
