# Supplementary material for: In vitro hydrolysis of V-type starch inclusion complexes of alkyl gallates: the controlled two-step release behavior of gallic acid and its beneficial effect on glycemic control
Source: Royal Society of Chemistry journal article supplement (doi:10.1039/d4fo05743k), 2025-01-01
Supplement: d4fo05743k8.pdf [file d4fo05743k8.pdf]

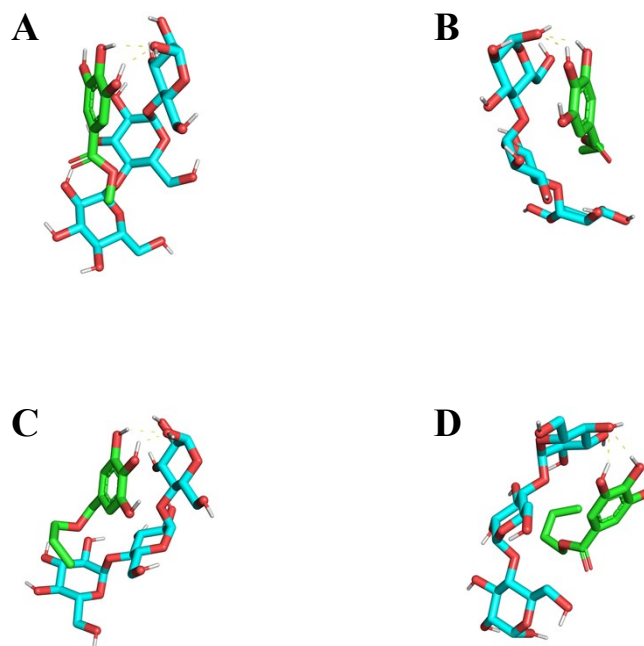

Figure 8S. Molecular docking of amylose with short-chain alkyl gallates including methyl gallate (A), ethyl gallate (B), propyl gallate (C), and butyl gallate (D).
