# Supplementary figures and images for: In vitro hydrolysis of V-type starch inclusion complexes of alkyl gallates: the controlled two-step release behavior of gallic acid and its beneficial effect on glycemic control
Source: Royal Society of Chemistry journal article supplement (doi:10.1039/d4fo05743k), 2025-01-01

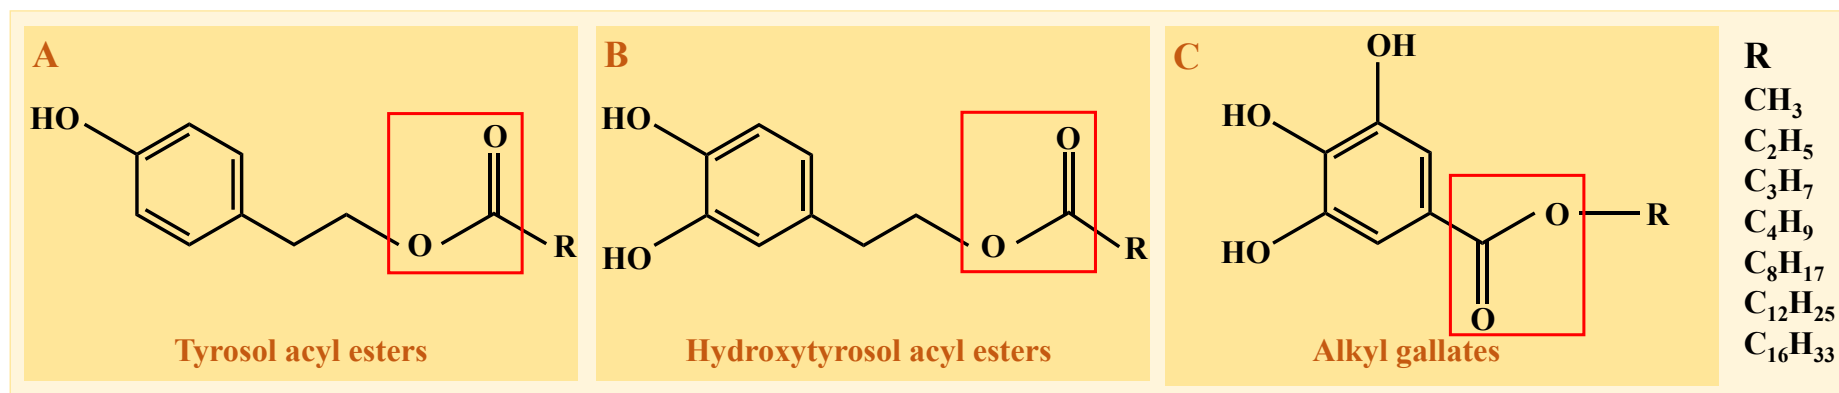

Figure 1S. Structures of tyrosol acyl esters (A), hydroxytyrosol acyl esters (B) and alkyl gallates (C).

Supplement: d4fo05743k1.pdf [file d4fo05743k1.pdf]
